# Supplementary material
Source: Springer Nature journal article supplement (https://www.springermedizin.de/resource/supplementary/12916_2010_403_MOESM2_ESM.pdf/9599876)

**TriVac Model (+/-20% change)**

**PneumoADIP**

**SUPREMES Model**

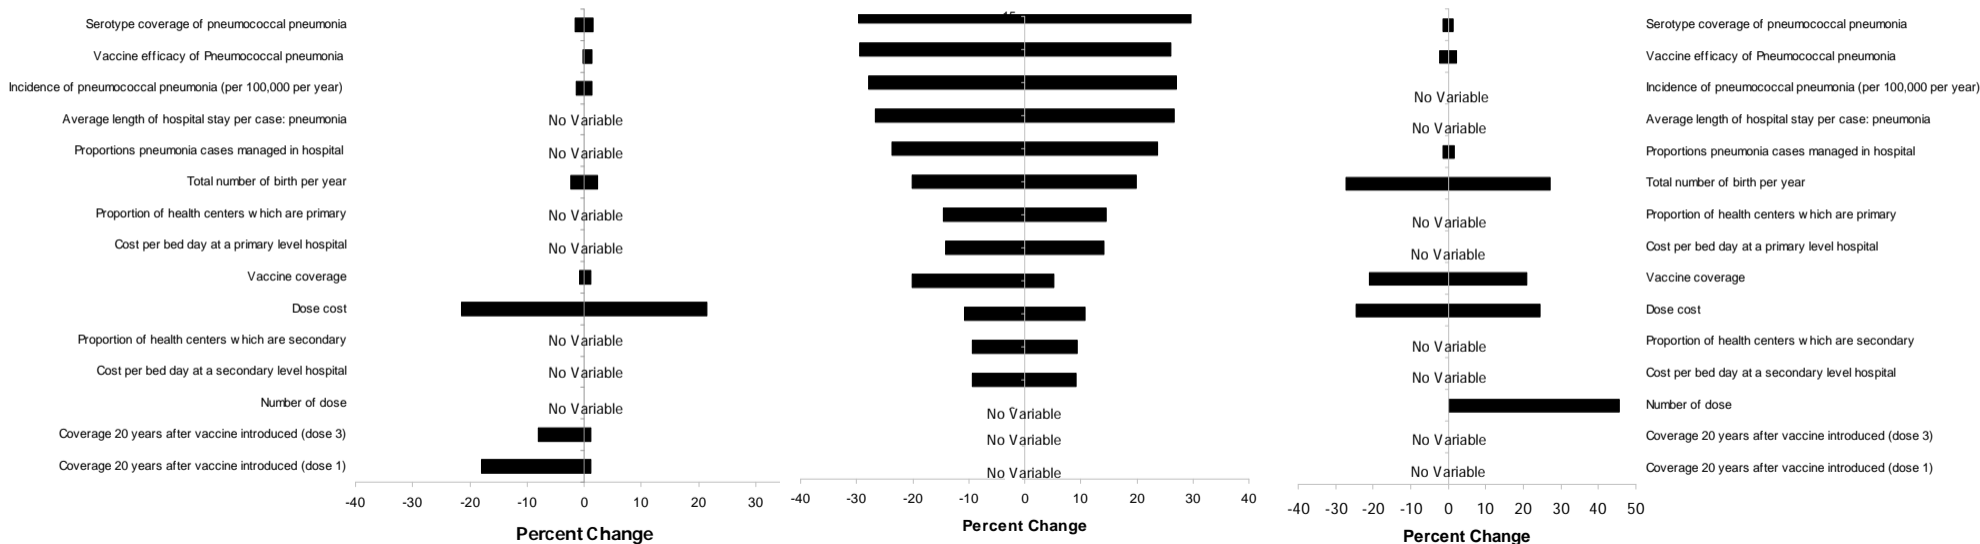

Supplement: MOESM2 [file 9599876]
